# Supplementary material for: Undercover Toxic Ménage à Trois of Amylin, Copper (II) and Metformin in Human Embryonic Kidney Cells
Source: MDPI journal article supplement (doi:10.3390/pharmaceutics13060830), 2021-06-03
Supplement: s1 [file s1]

# Supplementary Materials: Undercover Toxic Ménage à Trois of Amylin, Copper (II) and Metformin in Human Embryonic Kidney Cells

Terenzio Congiu, Mawadda N. Alghrably, Abdul-Hamid Emwas, Lukasz Jaremko, Joanna I. Lachowicz, Marco Piludu, Monica Piras, Gavino Faa, Giuseppina Pichiri, Mariusz Jaremko and Pierpaolo Coni

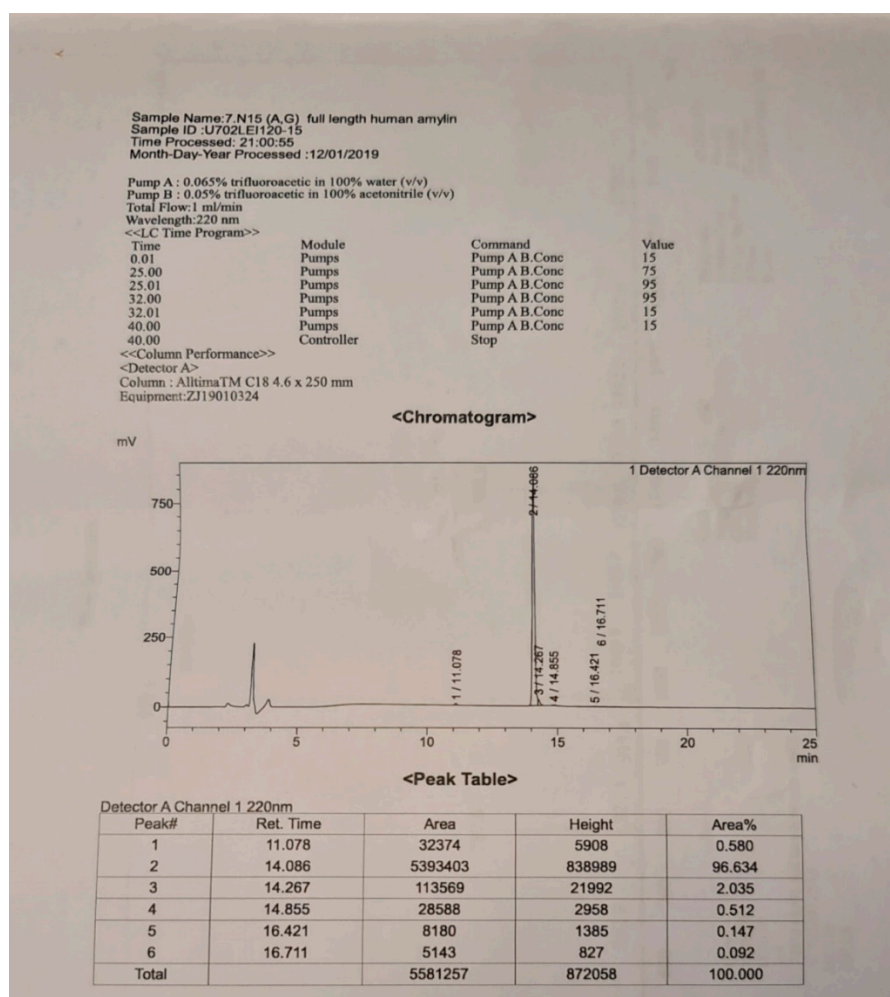

**Scheme S1.** Chromatogram of hIAPP sample delivered by GenScript.

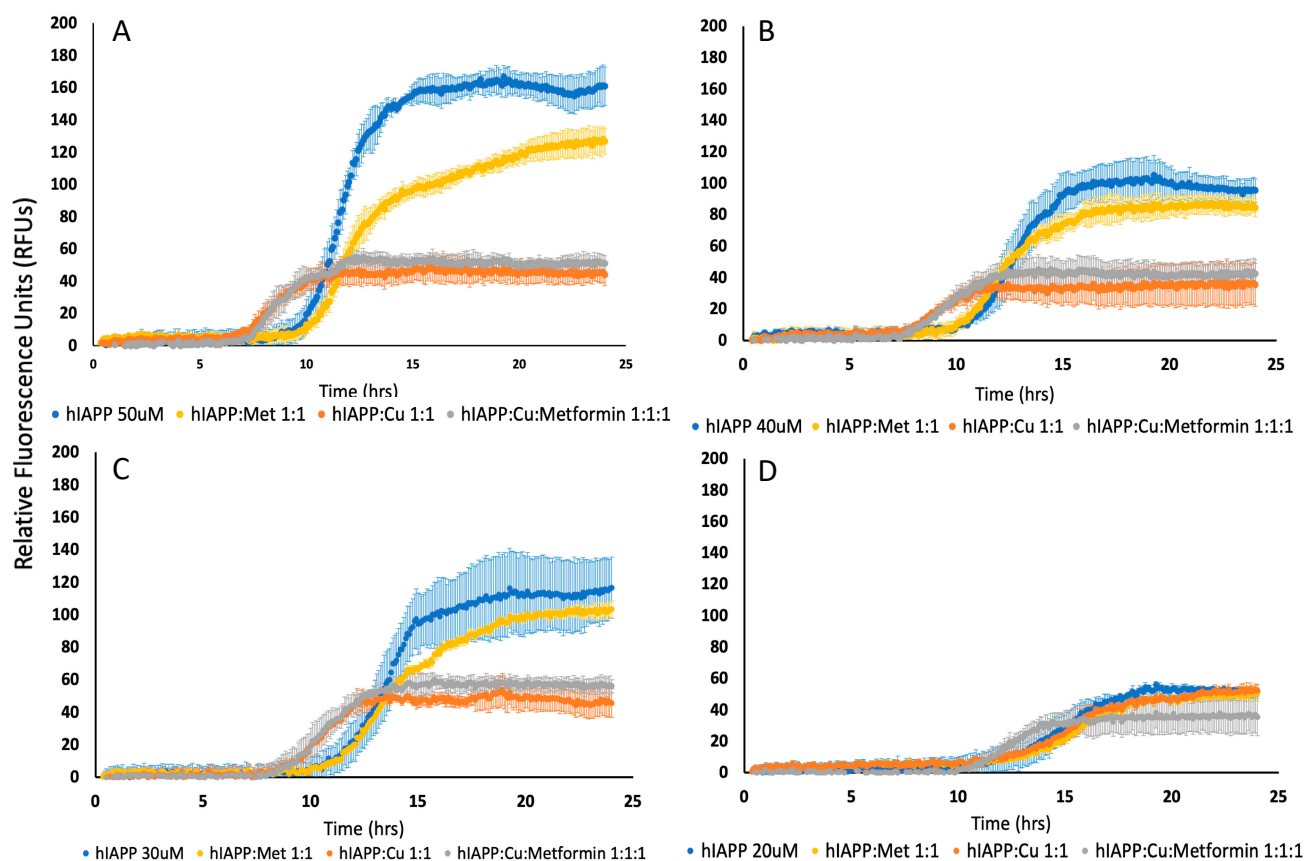

**Figure S1.** Effect of Cu (II) and Cu (II)/Metformin on hIAPP (in a 50 mM HEPES-buffered solution pH 7.4) fluorescence with ThT (20 μM) at 25 °C in different concentration conditions: (A) 50 μM; (B) 40 μM; (C) 30 μM and (D) 20 μM.

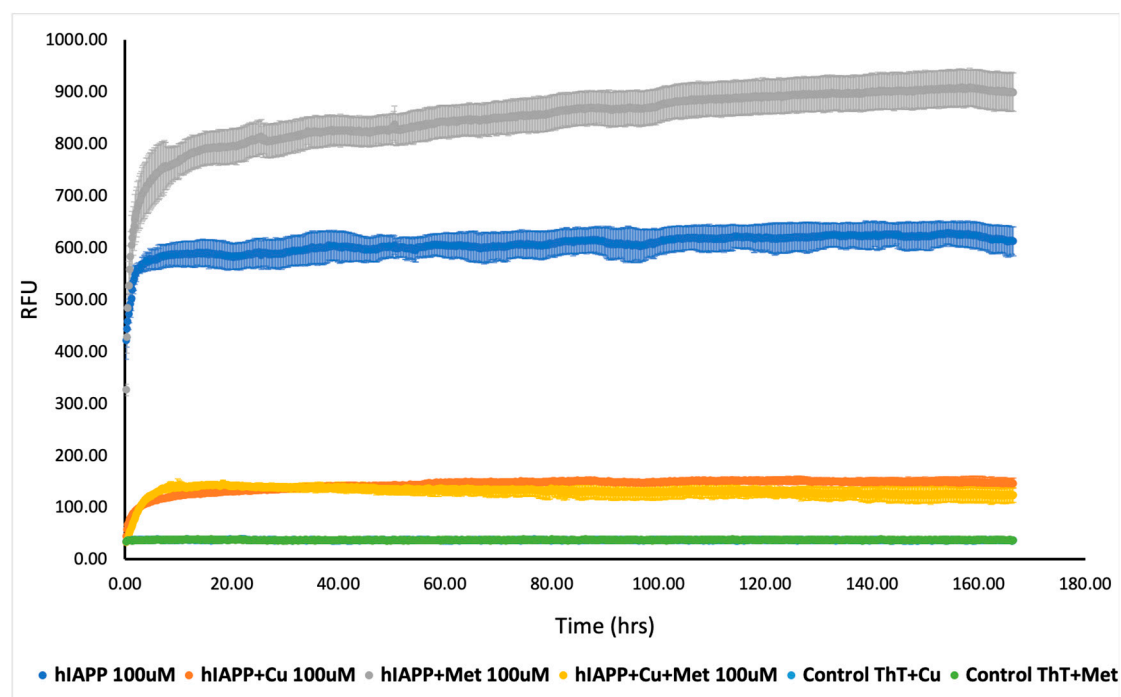

**Figure S2.** Effect of Cu (II) (100 μM) and Cu (II)/Metformin (100 μM; 1:1 molar ratio) on hIAPP (100 μM; in a 50 mM HEPES-buffered solution pH 7.4) fluorescence with ThT (20 μM) at 25 °C.

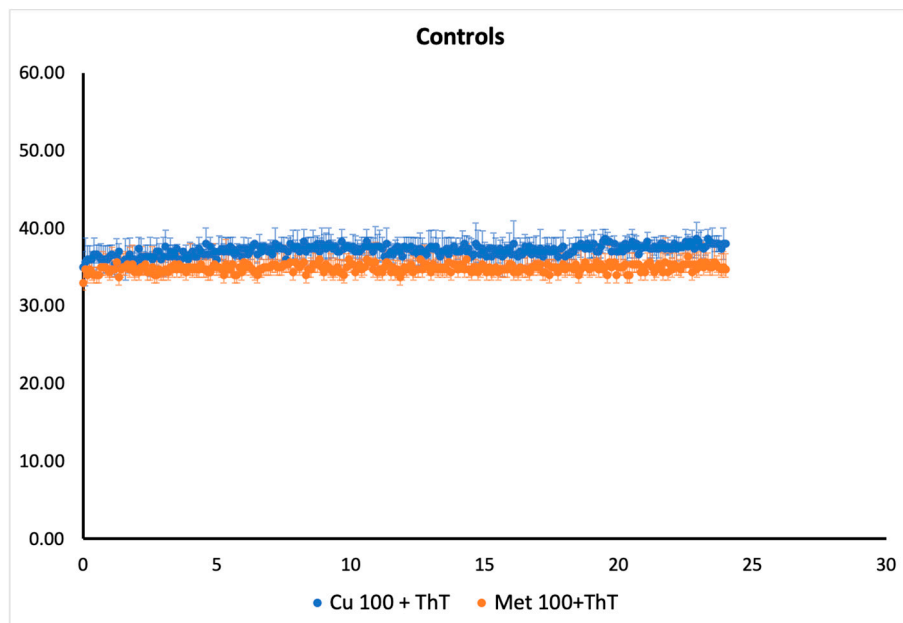

**Figure S3.** Effect of Cu (II) (100  $\mu$ M) and Metformin (100  $\mu$ M) on ThT (20  $\mu$ M) fluorescence at 25  $^{\circ}$ C.

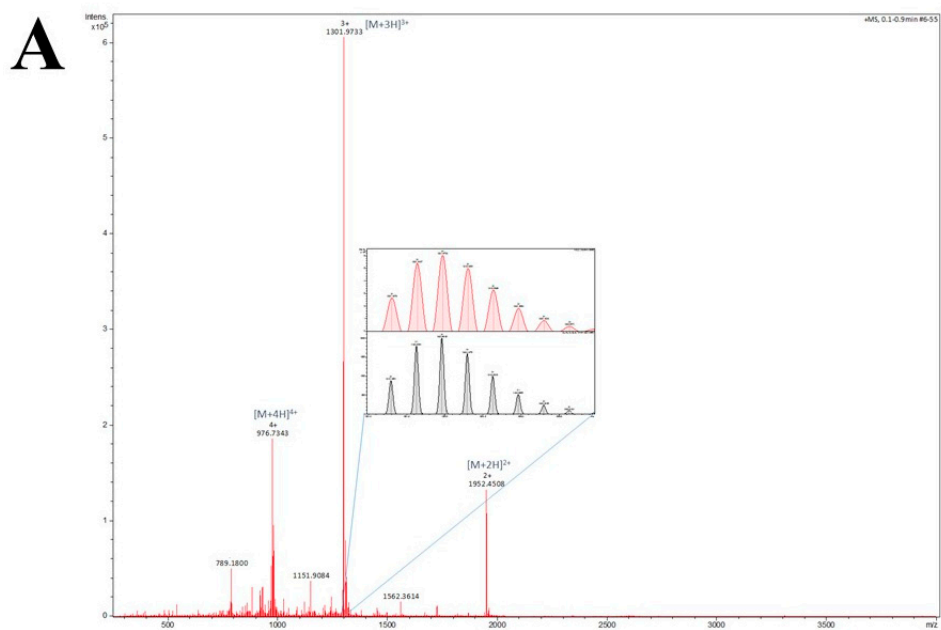

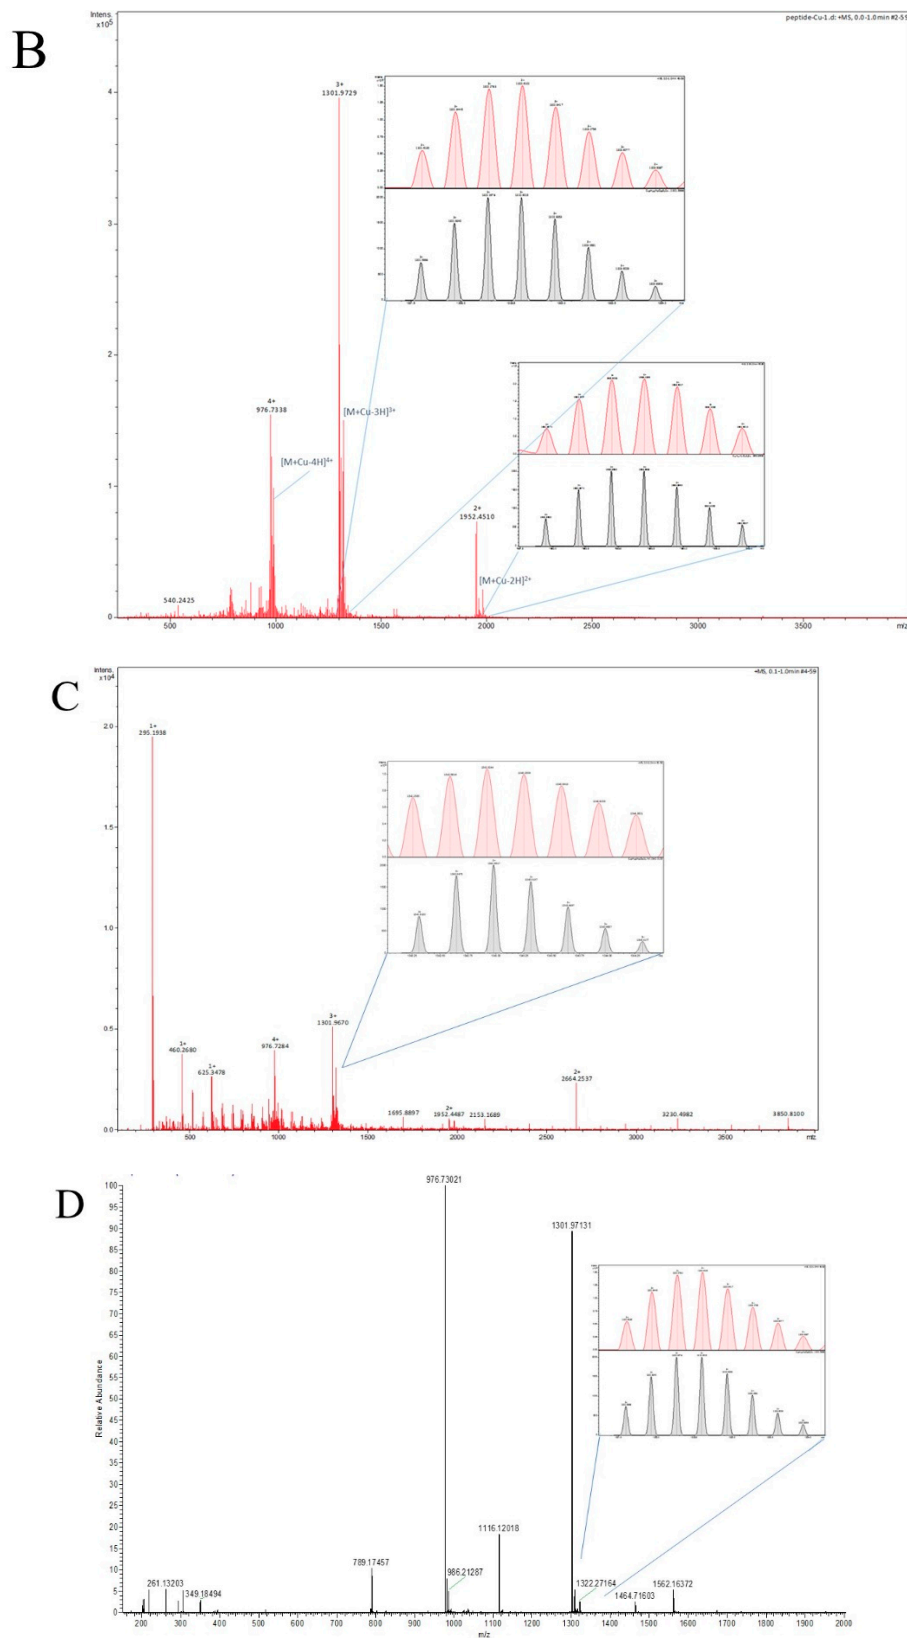

**Figure S4.** Full Scan Mass spectra acquired using the ESI(+)-Micro-TOF-MS instrument. **(A)** hIAPPI solution. Signals at 976.7343; 1301.9733 and 1952.4508  $m/z$  are assigned to hIAPPI (M) at different protonation states:  $[M+4H]^{4+}$ ;  $[M+3H]^{3+}$ ;  $[M+2H]^{2+}$ ; respectively. **(B)** hIAPPI/Cu(II) solution. Signals at 1322.6102 and 1983.4039  $m/z$  are assigned to copper complexes:  $[M+Cu(II)+H]^{3+}$  and  $[M+Cu(II)]^{2+}$ , respectively. **(C)** Metformin/hIAPPI solution. Signal at 1342.9244  $m/z$  is assigned to metformin (Met) adduct:  $[M+Met-3H]^{3+}$ . **(D)** Cu(II)/hIAPPI/Metformin solution. Signal 1322.6102 is assigned to copper complexes:  $[M+Cu(II)+H]^{3+}$ . Insets: comparison of experimental (up) and simulated (down) isotopic distributions.

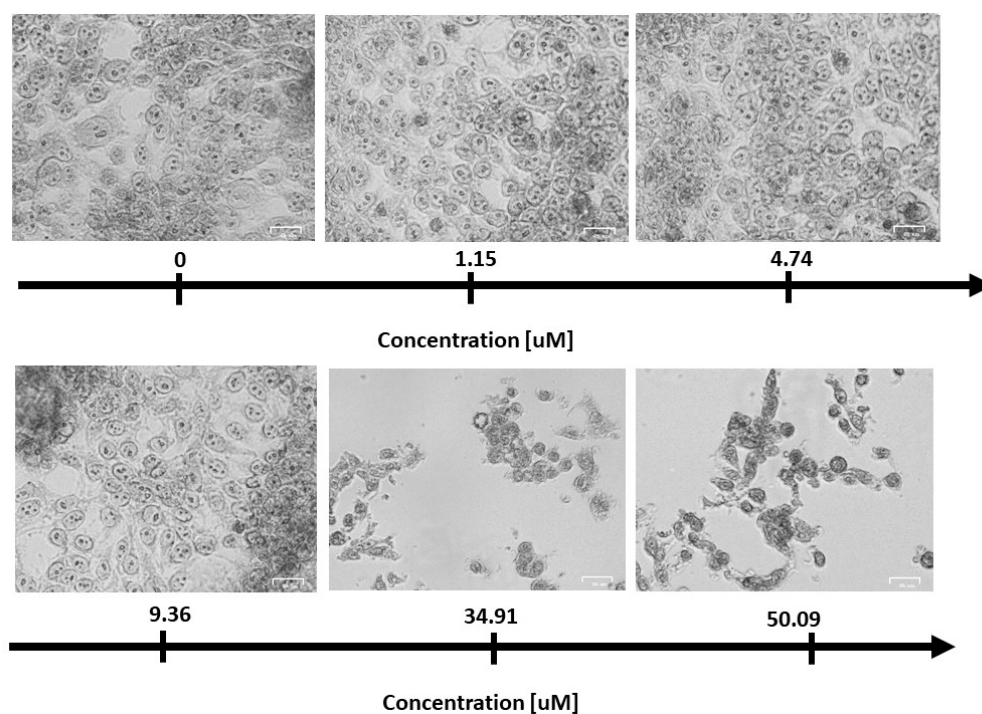

**Figure S5.** Live cell images of 293T cell cultures incubated 24h with growing concentration of hIAPP.

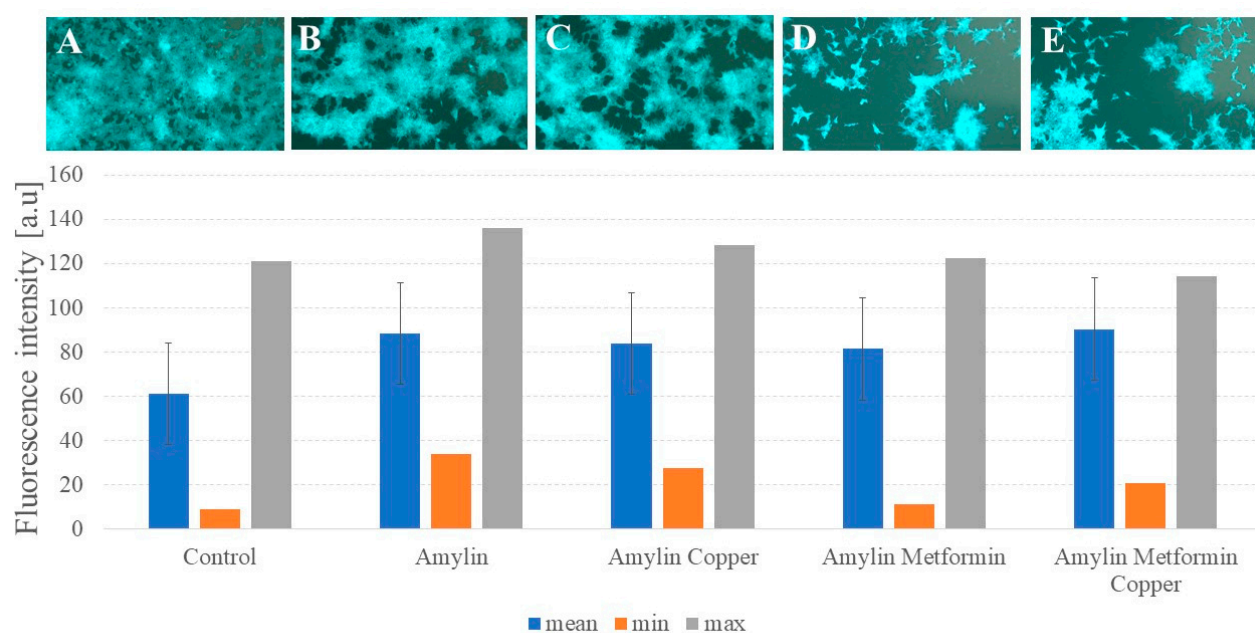

**Figure S6.** ThT live-cell fluorescence staining of 293T cells growing (A) in normal conditions; (B) with hIAPP (4.74  $\mu\text{M}$ ); (C) with hIAPP (4.74  $\mu\text{M}$ ) and copper ions (4.74  $\mu\text{M}$ ); (D) with hIAPP (4.74  $\mu\text{M}$ ) and metformin (4.74  $\mu\text{M}$ ); (E) with hIAPP (4.74  $\mu\text{M}$ ), copper ions (4.74  $\mu\text{M}$ ) and metformin (4.74  $\mu\text{M}$ ) for 24 h. The mean, min and max fluorescence intensity of each experimental sample (down) was calculated with ImageJ software.

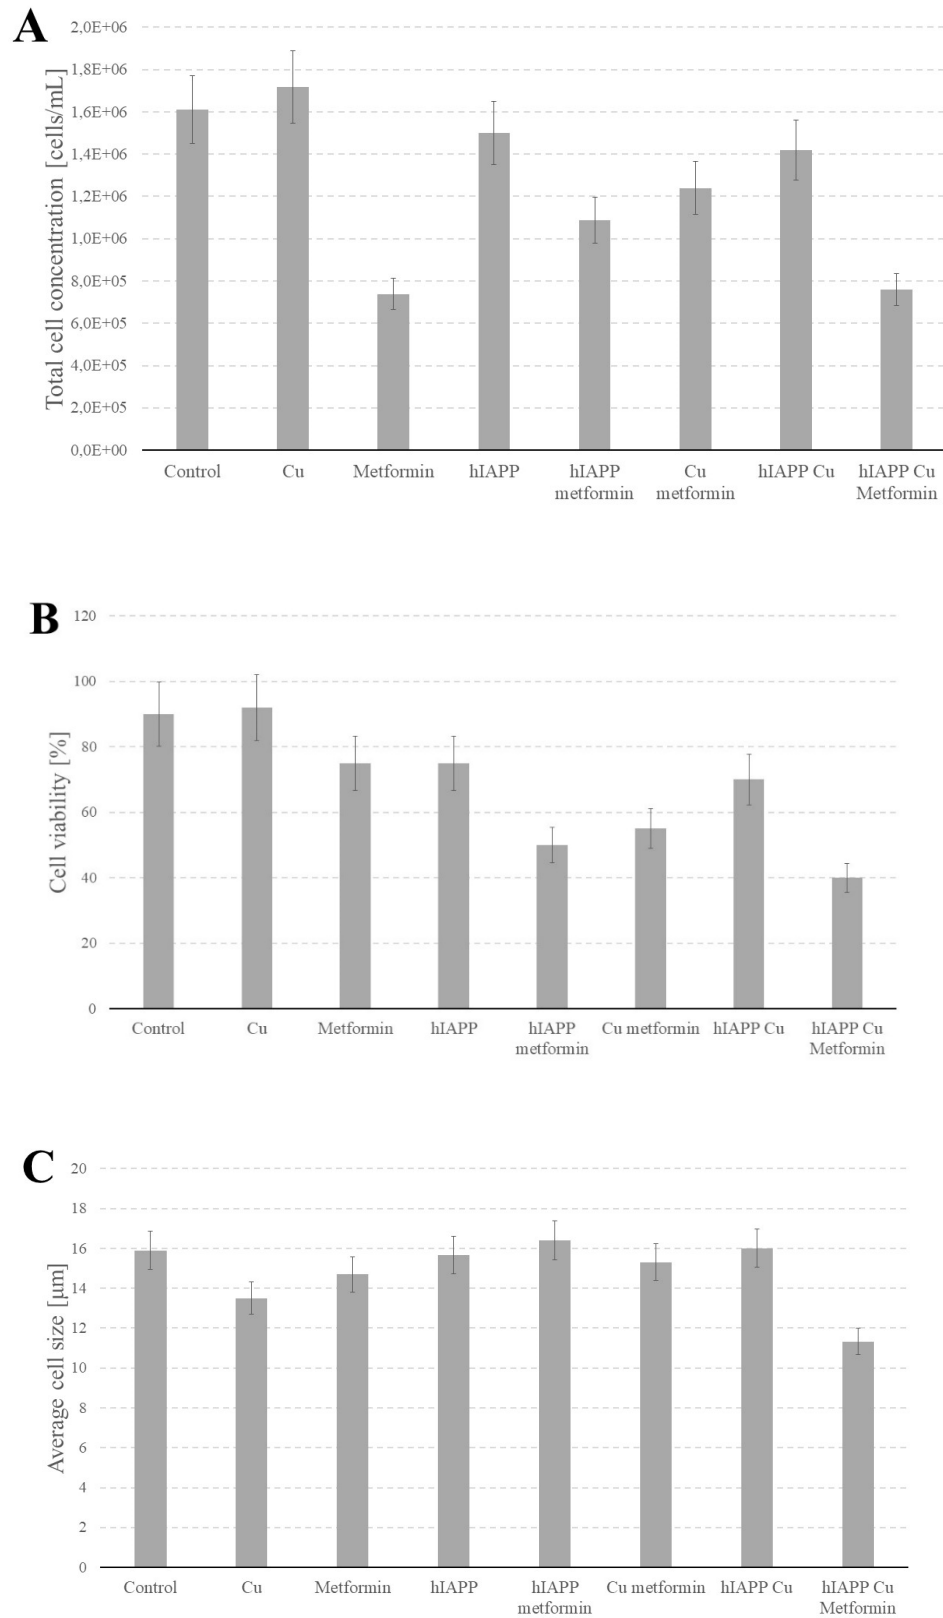

**Figure S7.** The graphical representation of LunaFL Cell Counter results of cell concentration (**A**), cell viability (**B**) and cell size (**C**).
